# Supplementary material for: In Vitro Antifungal and Antivirulence Activities of Biologically Synthesized Ethanolic Extract of Propolis-Loaded PLGA Nanoparticles against Candida albicans
Source: Evid Based Complement Alternat Med. 2019 Nov 30;2019:3715481. doi: 10.1155/2019/3715481 (PMC6907039; doi:10.1155/2019/3715481)
Supplement: Supplementary Materials — Supplementary Table 1: parameters for EEP-NPs and polymer-NPs preparation. Supplementary Table 2: list and sequences of primers [71, 72]. Supplementary Figure 1: EEP-NP 2-inhibited C. albicans hyphal germination. Supplementary Figure 2: EEP-NP 2-induced cell death in C. albicans. [file 3715481.f1.zip]

Archive with 12 entries (12 files):
- Final-supplementary data_Tragoolpua K November 14, 2019_ECAM_2932099.docx
- Supplementary Figure 1a_November 16, 2019_ECAM_2932124.docx
- Supplementary Figure 1b_November 16, 2019_ECAM_2932125.docx
- Supplementary Figure 1c_November 16, 2019_ECAM_2932126.docx
- Supplementary Figure 1d_November 16, 2019_ECAM_2932127.docx
- Supplementary Figure 1e_November 16, 2019_ECAM_2932128.docx
- Supplementary Figure 2a_November 16, 2019_ECAM_2932129.docx
- Supplementary Figure 2b_November 16, 2019_ECAM_2932130.docx
- Supplementary Figure 2c_November 16, 2019_ECAM_2932131.docx
- Supplementary Figure 2d_November 16, 2019_ECAM_2932132.docx
- Supplementary Figure 2e_November 16, 2019_ECAM_2932133.docx
- Supplementary Figure 2f_November 16, 2019_ECAM_2932134.docx
